# Supplementary material
Source: PubMed Central journal article supplement (PMC8223739)
Supplement: NIHMS1711633-supplement-Supplemental_Figure_1.pdf [file NIHMS1711633-supplement-Supplemental_Figure_1.pdf]

## Supplemental Figure 1. Validation of CAMK2A and CAMK2B Primers

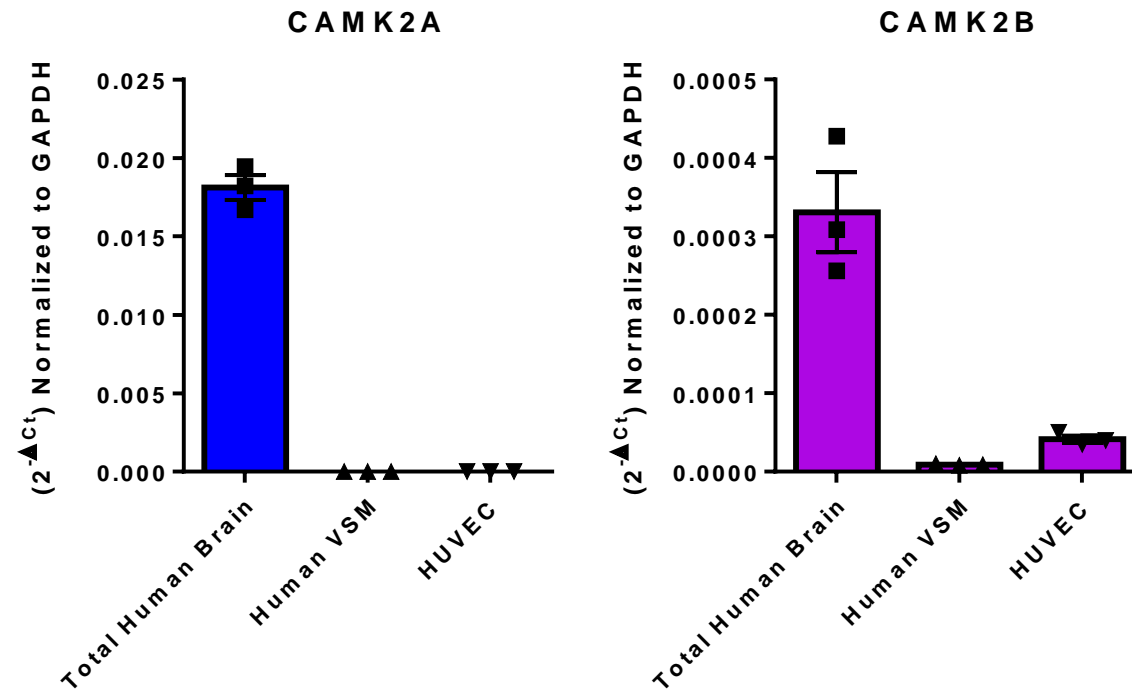

**Supplemental Figure 1. Validation of CAMK2A and CAMK2B primers and mREC enrichment.** qPCR analysis of CaMKII subtypes CAMK2A, CAMK2B, CAMK2D, and CAMK2G expression in RNA from HUVEC, hVSM, and total human brain lysate normalized to GAPDH. n = 3.
