# Supplementary material
Source: PubMed Central journal article supplement (PMC8223739)
Supplement: NIHMS1711633-supplement-Supplemental_Figure_2.pdf [file NIHMS1711633-supplement-Supplemental_Figure_2.pdf]

## Supplemental Figure 2. CaMKII $\delta$ does not contribute to the IL-6/JAK/STAT3-dependent increase in vascular permeability

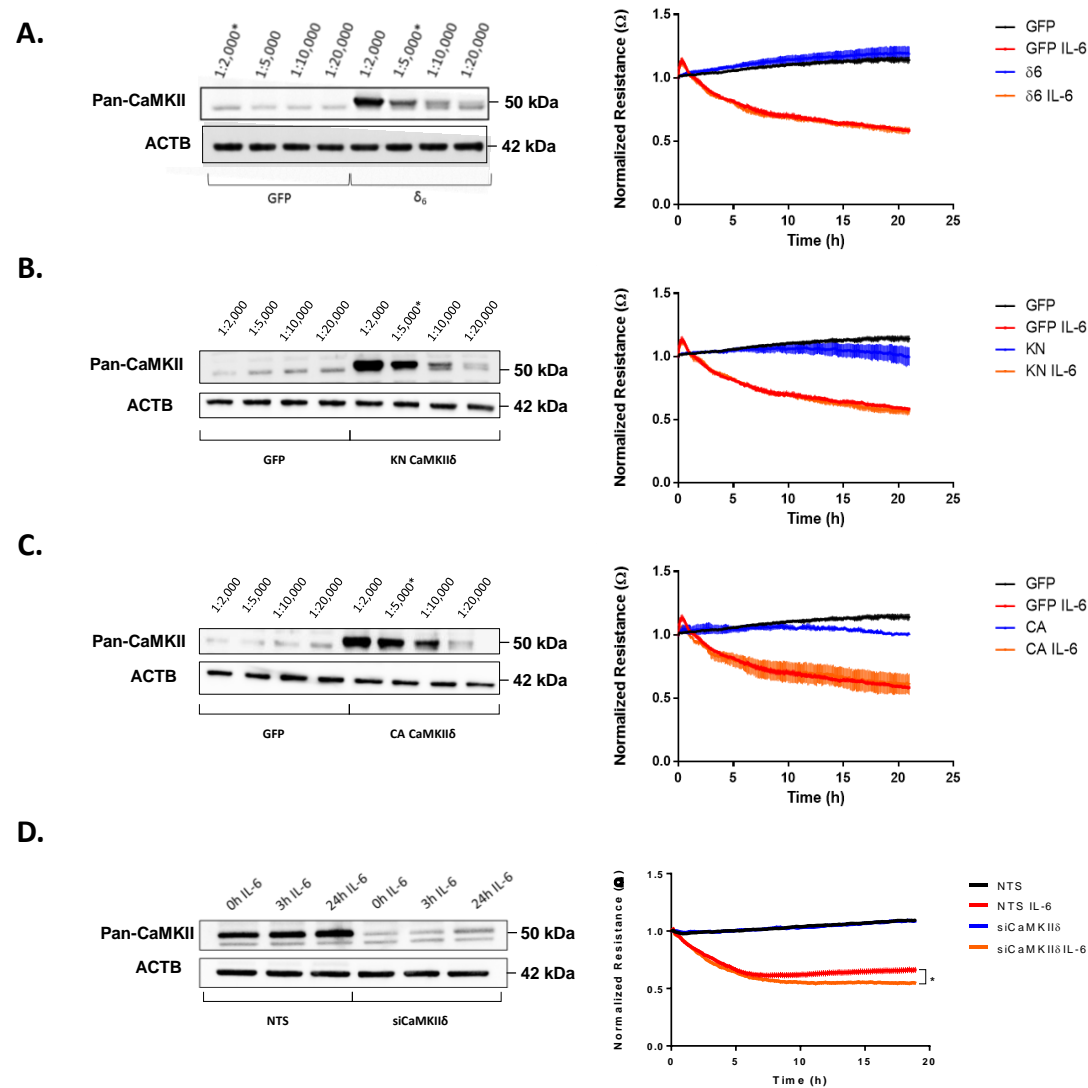

**Supplemental Figure 2. CaMKII $\delta$  does not contribute to the IL-6/JAK/STAT3-dependent increase in vascular permeability.** ECIS plotted as normalized resistance over time. Resistance values are normalized to resistance value at time zero: time zero is time of IL-6/sIL-6r treatment. Adenoviruses and siRNA are introduced 24h before IL-6 treatment. n = 3. Two-way ANOVA with repeated measures, (\*) p < 0.05.
