# Supplementary material
Source: PubMed Central journal article supplement (PMC8223739)
Supplement: NIHMS1711633-supplement-Supplemental_Figure_3.pdf [file NIHMS1711633-supplement-Supplemental_Figure_3.pdf]

# Supplemental Figure 3. CaMKII $\delta$ regulates endothelial cell migration velocity and directionality

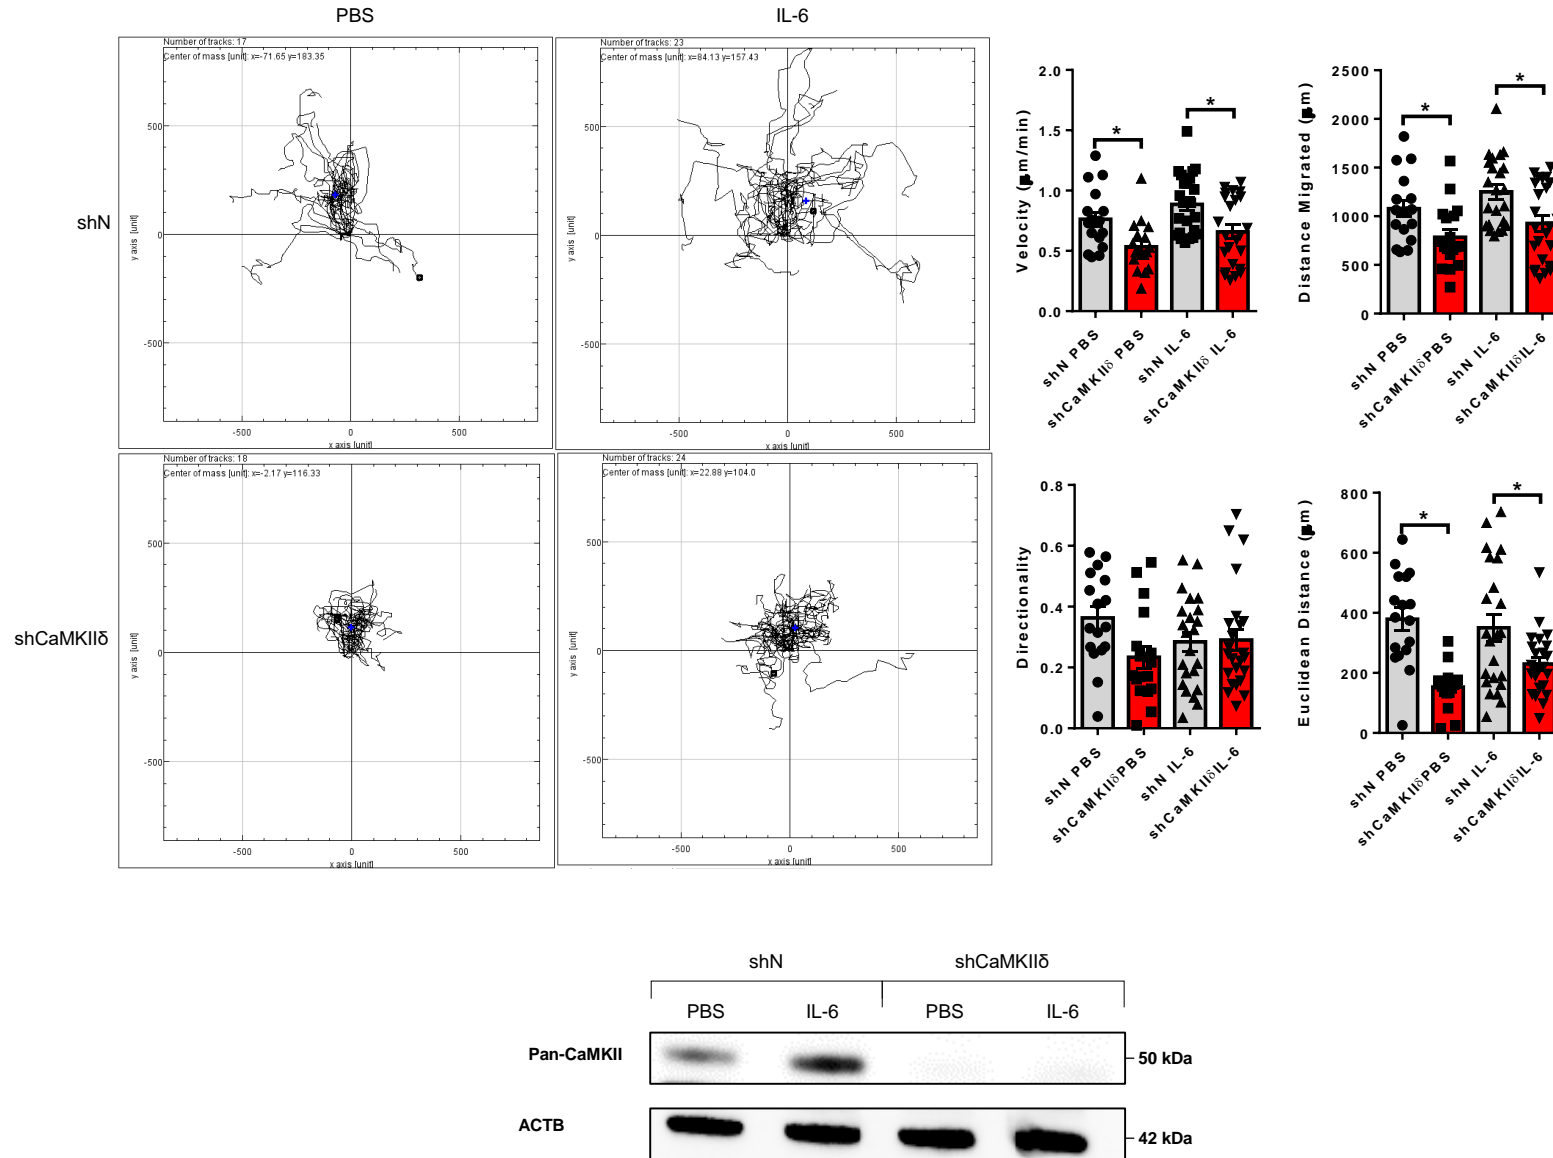

**Supplemental Figure 3. CaMKII $\delta$  regulates endothelial cell migration velocity and directionality.** Time-lapse live imaging of sparsely seeded HUVEC cell lines expression control shN or shCaMKII $\delta$ . Data acquired from manual tracking of cells was input into Chemotaxis Tool ImageJ plugin for quantitation of velocity, distance, Euclidean distance, and directionality. Knockdown of CaMKII $\delta$  was confirmed by immunoblot. n = 3, Two-way ANOVA, (\*) p < 0.05.
